# Supplementary material for: Intraguild Predation and Interspecific Killing as Structuring Forces of Carnivoran Communities in South America
Source: Springer Nature journal article supplement (doi:10.1007/s10914-013-9251-4), 2013-12-10
Supplement: MOESM2 [file 10914_2013_9251_MOESM2_ESM.doc]

SUPPLEMENTARY MATERIAL

Journal of Mammalian Evolution

**Intraguild predation and interspecific killing as structuring forces of carnivoran communities in South America**

Tadeu G. de Oliveira and Javier A. Pereira

**Corresponding author:**

Tadeu G. de Oliveira

Depto. Biologia, Universidade Estadual do Maranhão

Cidade Universitária Paulo VI, CP 09, São Luís-MA, Brasil 65055-150

E-mail: [tadeu4@yahoo.com](mailto:tadeu4@yahoo.com)

Phone/fax: +55(98) 3235-2219

Table S2. Sociality and activity of South American carnivorans. See Methods for data sources. References: +++ = main; ++ = moderate; + = occasional; 0 = none.

| Species | Sociality | | | Activity | | |
| --- | --- | --- | --- | --- | --- | --- |
|  | Solitary | Pairs | Group | Diurnal | Crepuscular | Nocturnal |
| **CANIDAE** |  |  |  |  |  |  |
| *Atelocynus microtis* – Short-eared dog | ++ | 0 | 0 | 0 | ++ | ++ |
| *Cerdocyon thous* – Crab-eating fox | ++ | ++ | ++ | 0 | ++ | ++ |
| *Chrysocyon brachyurus* – Maned wolf | ++ | 0 | 0 | 0 | ++ | ++ |
| *Lycalopex culpaeus* – Culpeo | ++ | 0 | 0 | ++ | ++ | ++ |
| *Lycalopex fulvipes* – Darwin’s fox | ++ | ++ | + | ++ | ++ | ++ |
| *Lycalopex griseus –* Chilla fox | ++ | + | + | ++ | ++ | ++ |
| *Lycalopex gymnocercus* – Pampas fox | ++ | + | 0 | + | ++ | ++ |
| *Lycalopex sechurae* – Sechura fox | ++ | + | + | + | + | ++ |
| *Lycalopex vetulus* – Hoary fox | ++ | + | 0 | 0 | ++ | ++ |
| *Speothos venaticus* – Bush dog | + | ++ | ++ | +++ | 0 | 0 |
| *Urocyon cinereoargenteus* – Grey fox | + | +++ | ++ | + | ++ | ++ |
| **URSIDAE** |  |  |  |  |  |  |
| *Tremarctos ornatus* – Spectacled bear | ++ | + | + | +++ | + | 0 |
| **PROCYONIDAE** |  |  |  |  |  |  |
| *Bassaricyon* spp. – Olingos | ++ | 0 | 0 | 0 | 0 | ++ |
| *Nasua nasua* – South American coati | ++ | 0 | ++ | ++ | ++ | 0 |
| *Nasuella olivacea* – Mountain coati | ++ | 0 | ++ | +++ | 0 | 0 |
| *Potos flavus* – Kinkajou | ++ | ++ | 0 | 0 | 0 | ++ |
| *Procyon cancrivorus* – Crab-eating raccoon | ++ | 0 | 0 | 0 | ++ | ++ |
| **MUSTELIDAE** |  |  |  |  |  |  |
| *Eira barbara* – Tayra | ++ | + | 0 | ++ | ++ | ++ |
| *Galictis cuja* – Lesser grison | ++ | ++ | ++ | ++ | ++ | ++ |
| *Galictis vittata* – Greater grison | ++ | ++ | ++ | ++ | ++ | ++ |
| *Lyncodon patagonicus* – Patagonian weasel | ? | ? | ? | 0 | ++ | ++ |
| *Mustela* spp. – Weasels | ? | ? | ? | ? | ? | ? |
| **MEPHITIDAE** |  |  |  |  |  |  |
| *Conepatus chinga* – Molina’s hog-nosed skunk | ++ | 0 | 0 | 0 | ++ | ++ |
| *Conepatus humboldtii* – Humboldt’s hog-nosed skunk | ++ | 0 | 0 | 0 | ++ | ++ |
| *Conepatus semistriatus* – Striped hog-nosed skunk | ++ | 0 | 0 | 0 | ++ | ++ |
| **FELIDAE** |  |  |  |  |  |  |
| *Leopardus colocolo* – Pampas cat | +++ | 0 | 0 | + | ++ | ++ |
| *Leopardus geoffroyi* – Geoffroy´s cat | +++ | 0 | 0 | 0 | ++ | ++ |
| *Leopardus guigna* – Guiña | +++ | 0 | 0 | ++ | ++ | ++ |
| *Leopardus jacobita* – Andean cat | +++ | 0 | 0 | + | ++ | ++ |
| *Leopardus pardalis* – Ocelot | +++ | 0 | 0 | + | ++ | ++ |
| *Leopardus tigrinus* – Oncilla | +++ | 0 | 0 | + | ++ | ++ |
| *Leopardus wiedii* – Margay | +++ | 0 | 0 | 0 | ++ | ++ |
| *Panthera onca* – Jaguar | +++ | 0 | 0 | + | ++ | ++ |
| *Puma concolor* – Puma | +++ | 0 | 0 | + | ++ | ++ |
| *Puma yagouaroundi* – Jaguarundi | +++ | 0 | 0 | ++ | ++ | ++ |
